# Supplementary material for: A Semi-Supervised Method for Drug-Target Interaction Prediction with Consistency in Networks
Source: PLoS One. 2013 May 7;8(5):e62975. doi: 10.1371/journal.pone.0062975 (PMC3646965; doi:10.1371/journal.pone.0062975)
Supplement: Material S5 — The predicted results with the top 100 highest scores in the class of Enzyme. (XLSX) [file pone.0062975.s005.xlsx]

## Sheet: Sheet1
The predicted results with the top 100 highest scores in the class of enzymes are listed below. Each line represents a potential interaction between a drug and a target.
drug ID	target ID
D01441	hsa1017
D00043	hsa1990
D01441	hsa1018
D01441	hsa983
D01441	hsa1021
D00160	hsa5624
D01441	hsa5562
D01441	hsa1020
D01441	hsa1022
D01441	hsa1019
D00043	hsa5624
D01441	hsa1025
D01441	hsa8558
D03350	hsa1445
D04024	hsa1445
D01977	hsa1445
D03252	hsa1445
D03218	hsa1445
D04025	hsa1445
D03350	hsa6725
D04024	hsa6725
D01977	hsa6725
D03252	hsa6725
D04023	hsa1445
D03218	hsa6725
D04025	hsa6725
D04023	hsa6725
D03350	hsa4145
D04024	hsa4145
D01977	hsa4145
D03252	hsa4145
D03218	hsa4145
D04025	hsa4145
D04023	hsa4145
D04024	hsa3932
D03350	hsa3932
D04024	hsa3055
D03350	hsa3055
D01977	hsa3932
D01977	hsa3055
D03252	hsa3932
D03218	hsa3932
D04025	hsa3932
D03252	hsa3055
D03218	hsa3055
D04025	hsa3055
D04023	hsa3932
D04023	hsa3055
D01441	hsa1147
D04024	hsa4067
D03350	hsa4067
D01977	hsa4067
D03252	hsa4067
D04024	hsa7294
D03350	hsa7294
D03218	hsa4067
D04025	hsa4067
D01977	hsa7294
D03252	hsa7294
D03218	hsa7294
D04025	hsa7294
D04023	hsa4067
D04023	hsa7294
D00043	hsa1504
D04024	hsa6714
D03350	hsa6714
D01977	hsa6714
D03252	hsa6714
D03218	hsa6714
D04025	hsa6714
D04024	hsa2534
D03350	hsa2534
D04024	hsa2241
D03350	hsa2241
D01977	hsa2534
D01977	hsa2241
D03252	hsa2534
D03218	hsa2534
D03252	hsa2241
D03218	hsa2241
D04023	hsa6714
D04025	hsa2534
D04025	hsa2241
D04023	hsa2534
D04023	hsa2241
D04024	hsa7525
D03350	hsa7525
D04024	hsa7535
D03350	hsa7535
D01977	hsa7525
D01977	hsa7535
D03252	hsa7525
D03218	hsa7525
D03252	hsa7535
D04025	hsa7525
D03218	hsa7535
D04025	hsa7535
D04023	hsa7525
D04023	hsa7535
D01441	hsa9641
