# Supplementary material for: A Semi-Supervised Method for Drug-Target Interaction Prediction with Consistency in Networks
Source: PLoS One. 2013 May 7;8(5):e62975. doi: 10.1371/journal.pone.0062975 (PMC3646965; doi:10.1371/journal.pone.0062975)
Supplement: Material S6 — The predicted results with the top 100 highest scores in the class of Ion channel. (XLSX) [file pone.0062975.s006.xlsx]

## Sheet: Sheet1
The predicted results with the top 100 highest scores in the class of ion channels are listed below. Each line represents a potential interaction between a drug and a target.
drug ID	target ID
D01768	hsa6331
D06172	hsa6328
D00553	hsa6328
D06172	hsa6329
D00553	hsa6329
D00504	hsa6331
D06172	hsa6323
D01768	hsa6328
D01768	hsa6329
D00553	hsa6323
D00504	hsa6328
D05077	hsa6328
D00504	hsa6329
D06172	hsa6326
D05077	hsa6329
D02347	hsa6263
D02347	hsa6262
D06172	hsa6335
D01768	hsa6323
D06172	hsa6334
D00553	hsa6326
D00553	hsa6335
D00553	hsa6334
D00553	hsa6336
D00636	hsa6331
D00533	hsa6328
D01118	hsa6331
D01768	hsa6326
D00533	hsa6329
D00798	hsa6331
D06172	hsa6336
D01768	hsa6335
D01768	hsa6334
D00373	hsa6331
D00594	hsa6331
D01111	hsa6331
D05077	hsa6323
D00504	hsa6326
D00812	hsa6331
D00733	hsa6328
D00480	hsa6331
D00631	hsa6331
D04370	hsa6331
D00274	hsa6331
D00733	hsa6329
D00708	hsa6328
D02092	hsa6331
D02566	hsa6331
D00816	hsa6331
D00708	hsa6329
D00799	hsa6331
D00504	hsa6335
D00504	hsa6334
D00791	hsa6331
D00219	hsa6331
D02360	hsa6331
D01799	hsa6331
D05077	hsa6326
D05077	hsa6335
D01599	hsa6331
D05077	hsa6334
D00456	hsa6331
D05077	hsa6336
D00234	hsa6331
D00733	hsa6323
D00364	hsa6331
D00563	hsa6331
D00574	hsa6331
D00504	hsa6336
D00593	hsa6331
D02485	hsa6331
D03037	hsa6331
D00533	hsa6323
D00521	hsa6331
D02163	hsa6331
D00636	hsa6328
D02362	hsa6331
D00697	hsa6331
D00798	hsa6328
D01118	hsa6328
D00636	hsa6329
D01118	hsa6329
D00798	hsa6329
D00708	hsa6323
D01575	hsa6331
D00477	hsa6336
D00533	hsa6336
D00779	hsa6331
D00594	hsa6328
D00831	hsa6331
D00373	hsa6328
D00474	hsa6331
D00733	hsa6326
D01253	hsa6331
D00594	hsa6329
D00631	hsa6328
D00373	hsa6329
D01111	hsa6328
D00733	hsa6335
D00733	hsa6334
